# Supplementary material for: Intestinal translocation of enterococci requires a threshold level of enterococcal overgrowth in the lumen
Source: PubMed Central journal article supplement (PMC6586816; doi:10.1038/s41598-019-45441-3), 2019-06-20

1 **Intestinal translocation of enterococci requires a threshold level of enterococcal overgrowth**  
2 **in the lumen**

3

4 Cristel Archambaud<sup>a,\*</sup>, Aurélie Derré-Bobillot<sup>a</sup>, Nicolas Lapaque<sup>a</sup>, Lionel Rigottier-Gois<sup>a</sup> and  
5 Pascale Serror<sup>a,\*</sup>

6

7 <sup>a</sup>Micalis Institute, INRA, AgroParisTech, Université Paris-Saclay, 78350 Jouy en Josas, France

8

9

10 \*Corresponding authors: [cristel.archambaud@inra.fr](mailto:cristel.archambaud@inra.fr); [pascale.serror@inra.fr](mailto:pascale.serror@inra.fr)

11 Tel : +33134652083

12 Fax : +33134652065

13

14 Running title: Gastro-intestinal tract translocation of *E. faecalis*

15

16 Keywords: *Enterococcus*, intestinal translocation

17

18

## 19 **Supporting information**

20 **Supp. Figure S1. Analysis of enterococcal translocation in CF-1 mice.** Each dot represents one  
21 CF-1 conventional mouse that was untreated (○) or treated for three consecutive days with  
22 clindamycin (●) and indicates the number of colony-forming units (CFUs) per gram of content (g  
23 of content) or per organ (n = 8, except for the luminal content of untreated mice in S1A, where  
24 n = 5). The dotted line represents the detection limit. Horizontal bars represent the median  
25 values from two independent experiments. Enterococcal counts in the gut lumen (A) were  
26 conducted on luminal content from the small intestine (cSi), the caecum (cCA) and the colon  
27 (cCO). Enterococcal counts in the gut tissues (B) were conducted on the small intestine (SI), the  
28 caecum (CA) and the colon (CO). Enterococcal counts in the peripheral organs (C) were  
29 conducted on the mesenteric lymph nodes (MLNs), the mesenteric adipose tissue (MAT), the  
30 spleen (SP), the kidneys (KDs), the liver (LV) and the heart (HR). Statistical analysis was  
31 performed using the Mann–Whitney test. Asterisks (\*) indicate statistically significant  
32 differences between counts (\*P < 0.05, \*\*P < 0.01, \*\*\*P < 0.001); ns, non-significant difference.

33  
34 **Supp. Figure S2. Enterococcal invasion and translocation assays in intestinal cells.** (A) Invasion  
35 assays. Human colonic epithelial cells (HT-29 and T84) were infected with eight *E. faecalis*  
36 strains at a multiplicity of infection of (MOI) of 50. Percentage invasion was determined after  
37 one hour as the ratio of intracellular bacteria to the number of bacteria in the initial inoculate.  
38 (B) Translocation assay. T84 cells were infected with four *E. faecalis* strains (JH2-2, OG1RF,  
39 VE14518 and VE14821). The integrity of the cell monolayer was evaluated by measuring  
40 transepithelial electrical resistance (TEER) for eight hours post-infection. The TEER of infected

41 cells was measured (left panel) and compared to that of uninfected cells (control). Translocation  
42 of each strain was evaluated by determining the number of enterococcal colony-forming units  
43 (CFUs) in the lower chamber of the transwell system (right panel). Data are expressed as the  
44 mean and standard error of the mean (SEM) of at least four independent experiments.  
45 Statistical analysis was performed using a non-parametric one-way analysis of variance  
46 (ANOVA). Asterisk (\*) and hash (#) symbols indicate statistically significant differences between  
47 values (\*\*P < 0.01, \*\*\*P < 0.001; # P < 0.05, ## P < 0.01). NS, non-significant difference.

48  
49 **Supp. Figure S3. Translocation of *E. faecalis* VE14821<sub>GFP</sub> in gnotobiotic C57BL/6J mice.** (A) Total  
50 VE14821<sub>GFP</sub> counts (□) in the gut tissues and in the peripheral organs of C57BL/6J gnotobiotic  
51 mice 13 hours after oral inoculation with VE14821<sub>GFP</sub>. Each dot represents one mouse (n = 4)  
52 and indicates the number of colony-forming units (CFUs) per organ. The dotted line represents  
53 the detection limit. Horizontal bars represent the median value. Counts in the gut tissues were  
54 conducted on the small intestine (SI), the caecum (CA) and the colon (CO). Counts in the  
55 peripheral organs were conducted on the mesenteric lymph nodes (MLNs), the mesenteric  
56 adipose tissue (MAT), the spleen (SP), the kidneys (KDs), the liver (LV) and the heart (HR). (B)  
57 Transmission electron microscopy showing an intraepithelial lymphocyte. (C) Transmission  
58 electron microscopy showing a goblet cell (GC) between two intestinal epithelial cells (IEC). L:  
59 lumen; BB: brush border. Scale bars are provided for both images.

60  
61 **Supp. Figure S4. Crossing of *E. faecalis* VE14821<sub>GFP</sub> into the caecum and small intestine of**  
62 **gnotobiotic C57BL/6J mice.** Transmission electron microscopy of the caecum (A) and small

63 intestine (B). Dotted windows indicate regions of interest. Close-up images of these regions are  
64 presented in the panels to the right of the original picture, with the correspondence between  
65 sets of images being indicated by a letter and a number. The double arrow indicates the host  
66 cell membrane. L: lumen; BB: brush border; Ef: *E. faecalis* VE14821<sub>GFP</sub>; IEC: intestinal epithelial  
67 cell; TJ: tight junction; n: nucleus; ECM: extracellular matrix; LP: lamina propria; M:  
68 mitochondria; BM: basal membrane. Scale bars are provided for each image.

Supp. Figure S1

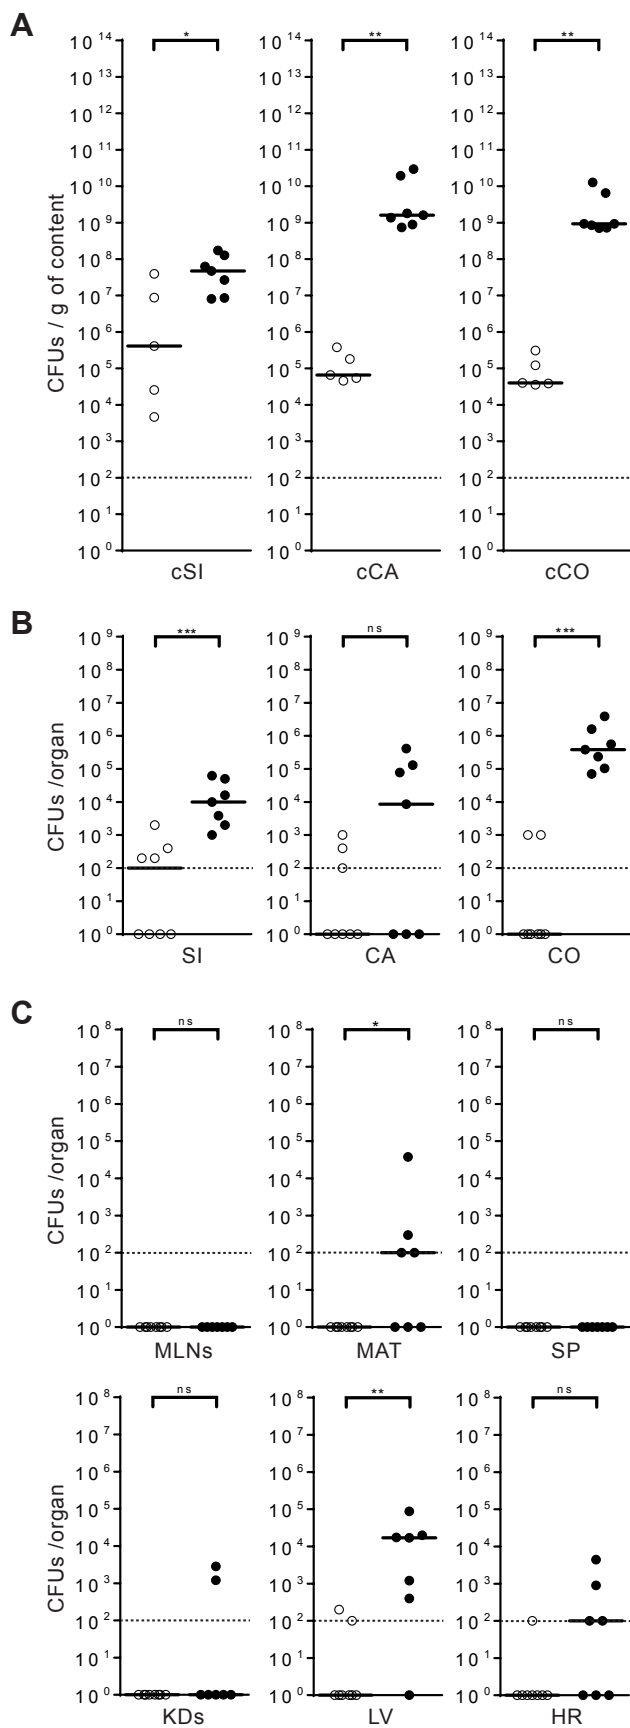

Supp. Figure S2

**A**

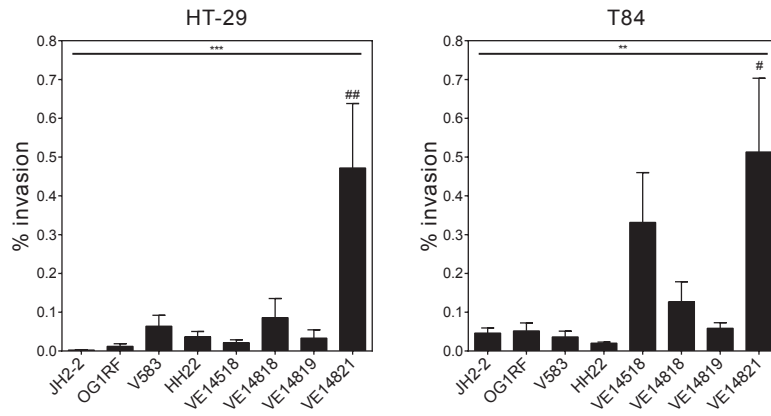

**B**

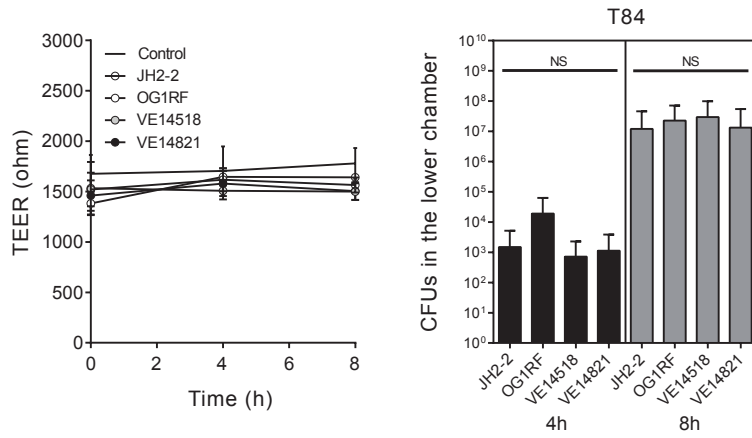

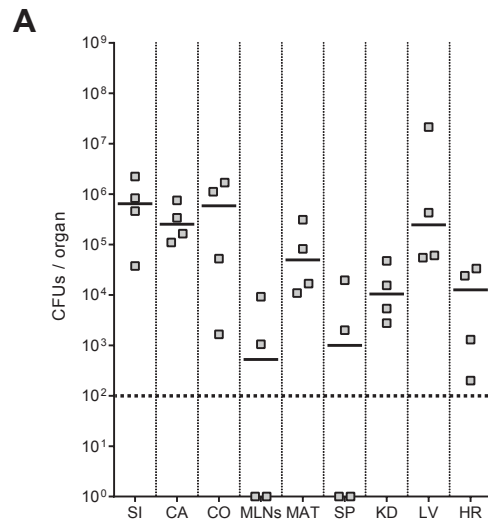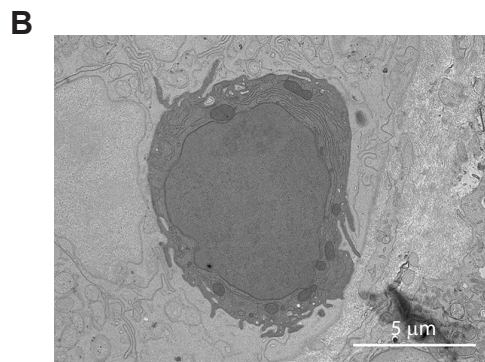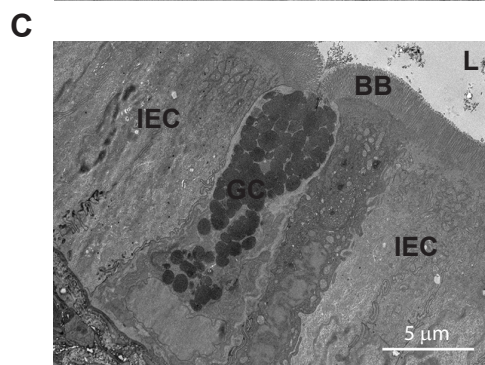

Supp. Figure S4

A

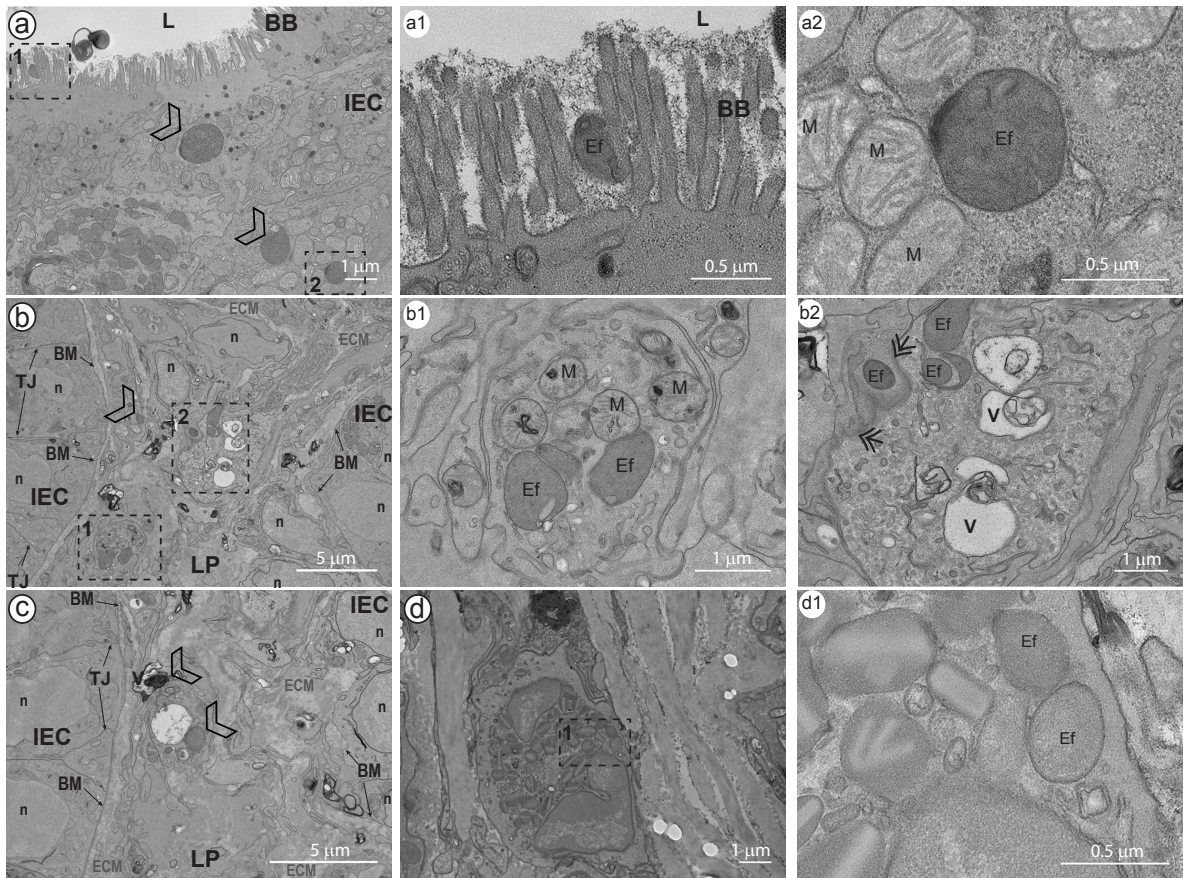

B

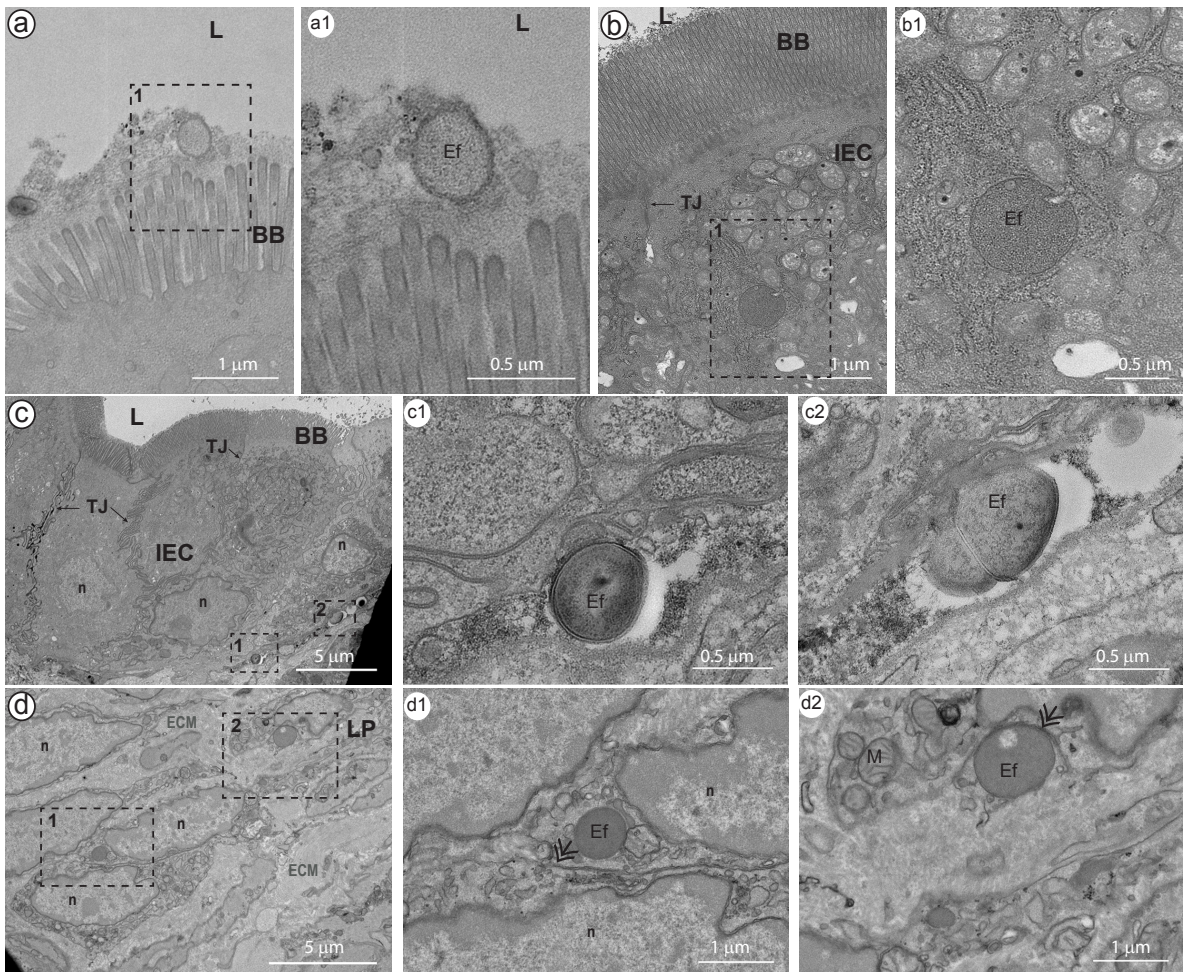

Supplement: 41598_2019_45441_MOESM1_ESM.pdf [file 41598_2019_45441_MOESM1_ESM.pdf]
